# Supplementary material for: SARS-CoV-2 causes dysfunction in human iPSC-derived brain microvascular endothelial cells potentially by modulating the Wnt signaling pathway
Source: Springer Nature journal article supplement (doi:10.1186/s12987-024-00533-9), 2024-04-07

Additional file 5: Fig. S5

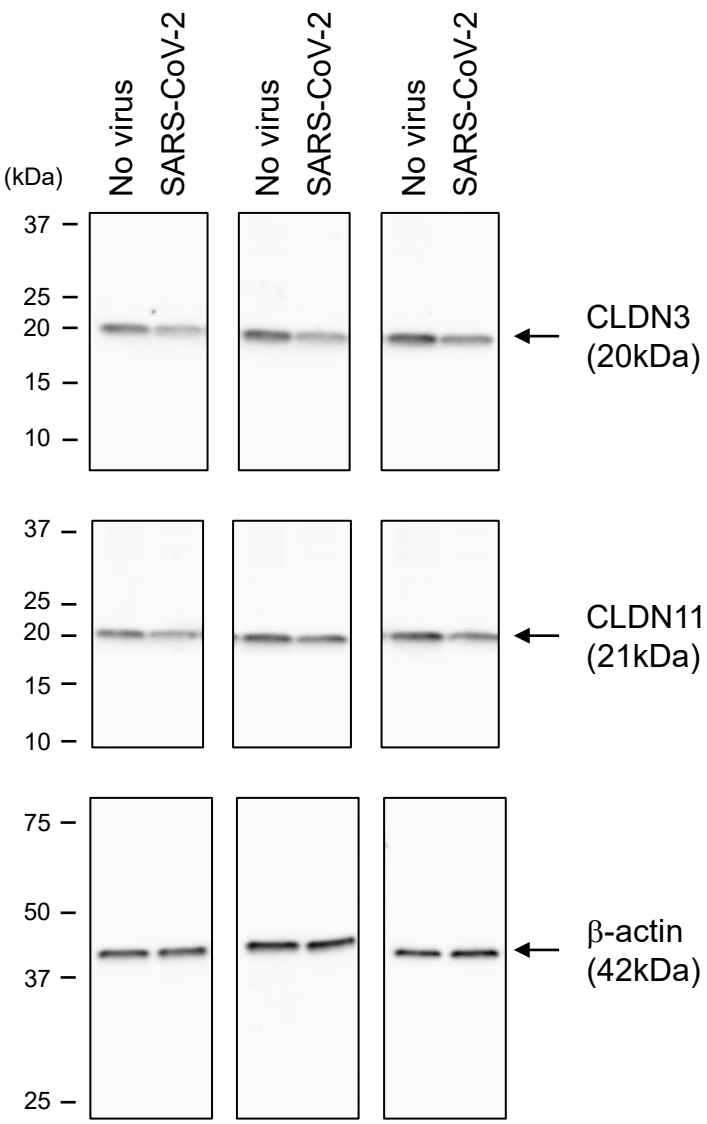

Supplement: 12987_2024_533_MOESM5_ESM.pdf [file 12987_2024_533_MOESM5_ESM.pdf]
